# Supplementary material for: Identification of Candidate Biomarker ASXL2 and Its Predictive Value in Pancreatic Carcinoma
Source: Front Oncol. 2021 Oct 8;11:736694. doi: 10.3389/fonc.2021.736694 (PMC8531590; doi:10.3389/fonc.2021.736694)
Supplement: Supplementary Table 1 — Correlation between ASXL2 mRNA expression/methylation and clinical characteristics in TCGA-PAAD. [file Table_1.xlsx]

## Sheet: Sheet1
Clinical features		ASXL2 expression		P value	ASXL2 methylation		P value
		Low (%)	High (%)		Low (%)	High (%)
Age	≤ 60	26(14.77)	31(17.61)	0.5194	26(14.77)	31(17.61)	0.5194
	> 60	62(35.23)	57(32.39)		62(35.23)	57(32.39)
Gender	Female	39(22.16)	40(22.73)	1	36(20.45)	43(24.43)	0.3632
	Male	49(27.84)	48(27.27)		52(29.55)	45(25.57)
Racea	White	79(44.89)	76(43.18)	0.1708	81(46.02)	74(42.05)	0.01525
	Black/African american	1(0.57)	5(2.84)		3(1.70)	3(1.70)
	Asian	7(3.98)	4(2.27)		1(0.57)	10(5.68)
Gradea	G1	17(9.66)	14(7.95)	0.2335	19(10.80)	12(6.82)	0.2394
	G2	50(28.41)	44(25.00)		42(23.86)	52(29.55)
	G3	18(10.23)	29(16.48)		26(14.77)	21(11.93)
	G4	2(1.14)	0(0.00)		0(0.00)	2(1.14)
	GX	1(0.57)	1(0.57)		1(0.57)	1(0.57)
Stagea	Stage I	12(6.82)	9(5.11)	0.8336	13(7.39)	8(4.55)	0.2343
	Stage II	69(39.20)	76(43.18)		69(39.20)	76(43.18)
	Stage III	2(1.14)	1(0.57)		3(1.70)	0(0.00)
	Stage IV	2(1.14)	2(1.14)		2(1.14)	2(1.14)
DFS status	DiseaseFree	35(19.89)	22(12.50)	0.1736	27(15.34)	30(17.05)	0.9734
	Recurred/Progressed	38(21.59)	41(23.30)		36(20.45)	43(24.43)
OS status	Alive	49(27.84)	35(19.89)	0.04978	39(22.16)	45(25.57)	0.4505
	Dead	39(22.16)	53(30.11)		49(27.84)	43(24.43)
Alcohol history	No	31(17.61)	32(18.18)	0.7112	34(19.32)	29(16.48)	0.2556
	Yes	54(30.68)	47(26.70)		44(25.00)	57(32.39)
Family history of cancer	No	24(13.64)	23(13.07)	1	23(13.07)	24(13.64)	0.9134
	Yes	32(18.18)	31(17.61)		29(16.48)	34(19.32)
Chronic pancreatitis history	No	70(39.77)	57(32.39)	0.3926	59(33.52)	68(38.64)	0.4294
	Yes	5(2.84)	8(4.55)		4(2.27)	9(5.11)
Radiotherapy	No	50(28.41)	51(28.98)	0.208	48(27.27)	53(30.11)	0.5118
	Yes	20(11.36)	11(6.25)		12(6.82)	19(10.80)
Sample inital weight	≤ medianb	48(27.27)	19(10.80)	0.07286	24(13.64)	43(24.43)	1
	> median	37(21.02)	30(17.05)		25(14.20)	42(23.86)
Histological typea	Pancreas-Adenocarcinoma Ductal Type	69(39.20)	76(43.18)	0.6963	78(44.32)	67(38.07)	0.1193
	Pancreas-Adenocarcinoma-Other Subtype	15(8.52)	10(5.68)		8(4.55)	17(9.66)
	Pancreas-Colloid (mucinous non-cystic) Carcinoma	2(1.14)	2(1.14)		2(1.14)	2(1.14)
	Pancreas-Undifferentiated Carcinoma	1(0.57)	0(0.00)		0(0.00)	1(0.57)
Patient primary tumor site	Body of Pancreas	7(3.98)	7(3.98)	0.6141	5(2.84)	9(5.11)	0.6393
	Head of Pancreas	66(37.50)	72(40.91)		72(40.91)	66(37.50)
	Tail of Pancreas	9(5.11)	5(2.84)		6(3.41)	8(4.55)
	Other	6(3.41)	4(2.27)		5(2.84)	5(2.84)
Surgical margin resection statusa	R0	51(28.98)	54(30.68)	1	52(29.55)	53(30.11)	0.05176
	R1	25(14.20)	27(15.34)		30(17.05)	22(12.50)
	R2	2(1.14)	3(1.70)		0(0.00)	5(2.84)
	RX	2(1.14)	2(1.14)		3(1.70)	1(0.57)
Primary therapy outcomea	Complete Remission/Response	24(13.64)	18(10.23)	0.3108	19(10.80)	23(13.07)	0.3602
	Partial Remission/Response	5(2.84)	3(1.70)		4(2.27)	4(2.27)
	Progressive Disease	15(8.52)	23(13.07)		22(12.50)	16(9.09)
	Stable Disease	5(2.84)	3(1.70)		2(1.14)	6(3.41)
Tumor resected max dimension	≤ 4 cm	52(29.55)	57(32.39)	0.913	54(30.68)	55(31.25)	0.9114
	> 4 cm	27(15.34)	27(15.34)		28(15.91)	26(14.77)
Person neoplasm status	Tumor Free	29(16.48)	26(14.77)	0.5496	29(16.48)	26(14.77)	0.7553
	With Tumor	32(18.18)	38(21.59)		40(22.73)	30(17.05)
ASXL2 mRNA expression	Low	-	-	-	29(16.48)	59(33.52)	< 0.001
	High	-	-		59(33.52)	29(16.48)
ASXL2 methylation	Low	29(16.48)	59(33.52)	< 0.001	-	-	-
	High	59(33.52)	29(16.48)		-	-
a Fisher's exact test.
b the median of sample initial weight is 155g
